# Supplementary material for: Hepatoprotective effects of ginsenoside Rk3 in acetaminophen-induced liver injury in mice by activation of autophagy
Source: Royal Society of Chemistry journal article supplement (doi:10.1039/d1fo02081a), 2021-01-01
Supplement: d1fo02081a1.pdf [file d1fo02081a1.pdf]

## **Hepatoprotective effects of ginsenoside Rk3 in acetaminophen-induced liver injury in mice by activation of autophagy**

Lin-lin Qu<sup>1, 2, 3, #</sup>, Rong-zhan Fu<sup>1, 2, 3, #</sup>, Xiaoxuan Ma<sup>1, 2, 3</sup>, Dai-di Fan<sup>1, 2, 3, \*</sup>

<sup>1</sup>Shaanxi Key Laboratory of Degradable Biomedical Materials, School of Chemical Engineering, Northwest University, Taibai North Road 229, Xi'an, Shaanxi 710069, China.

<sup>2</sup>Shaanxi R&D Center of Biomaterials and Fermentation Engineering, School of Chemical Engineering, Northwest University, Taibai North Road 229, Xi'an, Shaanxi 710069, China.

<sup>3</sup>Biotech. & Biomed. Research Institute, Northwest University, Taibai North Road 229, Xi'an, Shaanxi 710069, China.

# These author contributed equally to this work.

\* Address correspondence to: Dai-di Fan, E-mail: [fandaidi@nwu.edu.cn](mailto:fandaidi@nwu.edu.cn), Tel./fax: +86-29-88305118

**Table S1 Information of antibodies for western blot**

| <b>Antibody</b> | <b>Working Dilution (IF)</b> | <b>Working Dilution (IHC)</b> | <b>Working Dilution (WB)</b> | <b>Manufacturer</b> | <b>Molecular Weight (kDa)</b> | <b>Cat. Number</b> |
|-----------------|------------------------------|-------------------------------|------------------------------|---------------------|-------------------------------|--------------------|
| LC3B            | 1:1000                       | 1:1000                        | 1:1000                       | Abcam               | 15                            | ab63817            |
| Nrf2            | ---                          | ---                           | 1:500                        | Abcam               | 68                            | ab62352            |
| CYP2E1          | 1:500                        | 1:500                         | 1:10000                      | PTG                 | 57                            | 19937-1-AP         |
| ATG5            | ---                          | 1:500                         | 1:2000                       | PTG                 | 32                            | 10181-2-AP         |
| ATG7            | ---                          | 1:500                         | 1:2000                       | PTG                 | 78                            | 10088-2-AP         |
| ATG12           | ---                          | 1:200                         | 1:1000                       | PTG                 | 15                            | 11122-1-AP         |
| Beclin1         | ---                          | 1:500                         | 1:5000                       | PTG                 | 60                            | 11306-1-AP         |
| P62             | 1:200                        | 1:200                         | 1:4000                       | PTG                 | 62                            | 18420-1-AP         |
| TNF- $\alpha$   | ---                          | 1:1000                        | 1:4000                       | PTG                 | 50                            | 60291-1-Ig         |
| IL-6            | ---                          | 1:500                         | 1:1000                       | PTG                 | 23                            | 21865-1-AP         |
| IL-1 $\beta$    | ---                          | 1:500                         | 1:6000                       | PTG                 | 32                            | 66737-1-Ig         |
| 3-NT            | ---                          | 1:500                         | ---                          | Bioss               | ---                           | bs-8551R           |
| TLR4            | 1:200                        | 1:500                         | 1:2000                       | Bioss               | 96                            | bs-1021R           |
| NLRP3           | ---                          | 1:500                         | 1:1000                       | Bioss               | 110                           | bs-10021R          |
| Caspase1        | ---                          | 1:500                         | 1:2000                       | Bioss               | 45                            | bs-10442R          |
| NQO1            | 1:200                        | ---                           | 1:2000                       | Bioss               | 31                            | bs-2184R           |
| HO-1            | ---                          | ---                           | 1:1000                       | CST                 | 33                            | #86806             |
| Lamin B1        | ---                          | ---                           | 1:2000                       | CST                 | 67                            | #17416             |
| GAPDH           | ---                          | ---                           | 1:1000                       | CST                 | 36                            | #5174              |

**Table S2 Sequences of primers used in qRT-PCR**

| <b>Genes</b>  | <b>Forward primer (5'-3')</b> | <b>Reverse primer (5'-3')</b> |
|---------------|-------------------------------|-------------------------------|
| GAPD<br>H     | GCTGAGTATGTCGTGGAGT           | G TTCACACCCATCACAAAC          |
| TNF- $\alpha$ | GTCTACTGAACTTCGGGGTGAT        | GGCTACAGGCTTGTCACTC<br>G      |
| IL-6          | CTCTGCAAGAGACTTCCATCC         | GAATTGCCATTGCACAAC<br>C       |
| IL-1 $\beta$  | CCAACAAGTGATATTCTCCATG<br>AG  | ACTCTGCAGACTCAAAC<br>CA       |

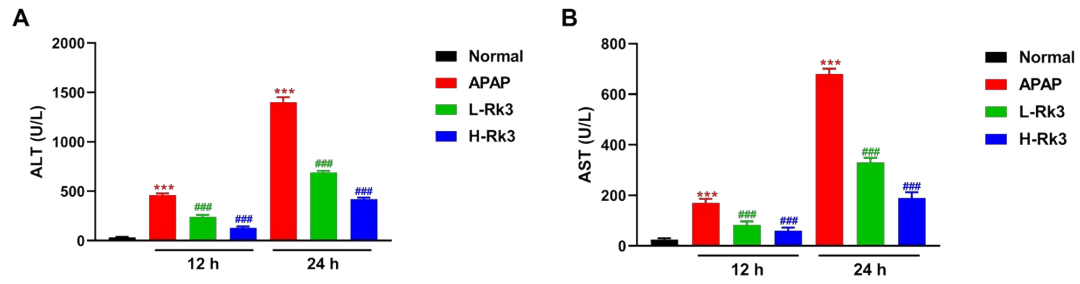

Figure S1. Effect of ginsenoside Rk3 on APAP-induced liver injury. Mice were treated 300 mg/kg APAP, after 2 h, mice in ginsenoside Rk3 groups were treated ginsenoside Rk3, (A) serum ALT and (B) AST levels in different time were measured using ELISA. Data are presented as mean  $\pm$  SD with 6 mice per group. \*\*\*  $P < 0.001$  compared with the Normal group, #  $P < 0.05$  compared with the APAP group, ##  $P < 0.01$  compared with the APAP group, ###  $P < 0.001$  compared with the APAP group.

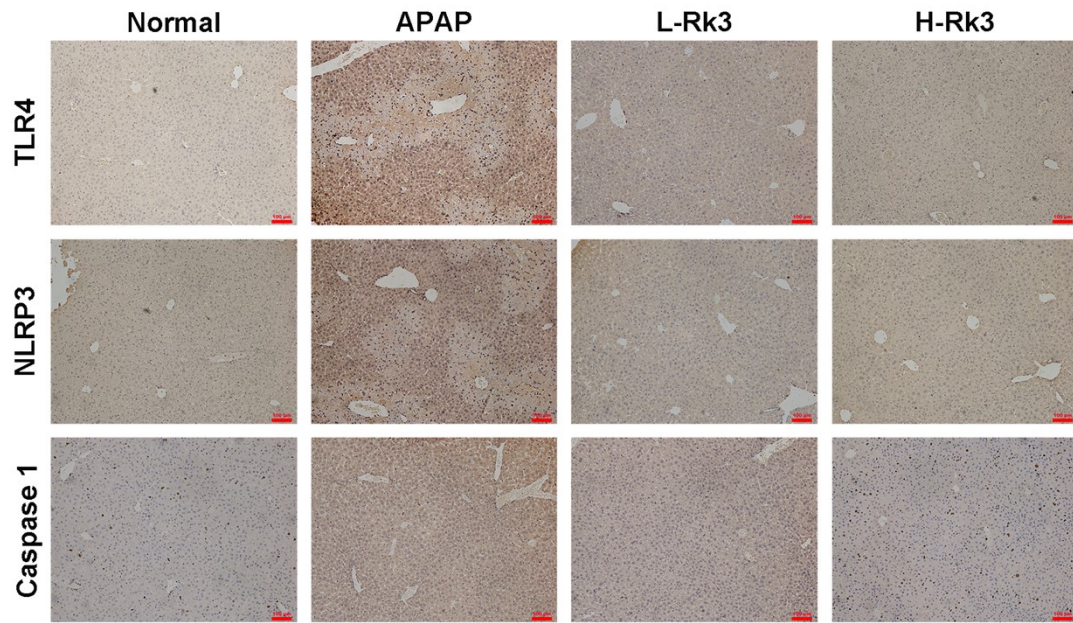

**Figure S2 Immunohistochemical staining of TLR4, NLRP3, and Caspase 1 in liver.**

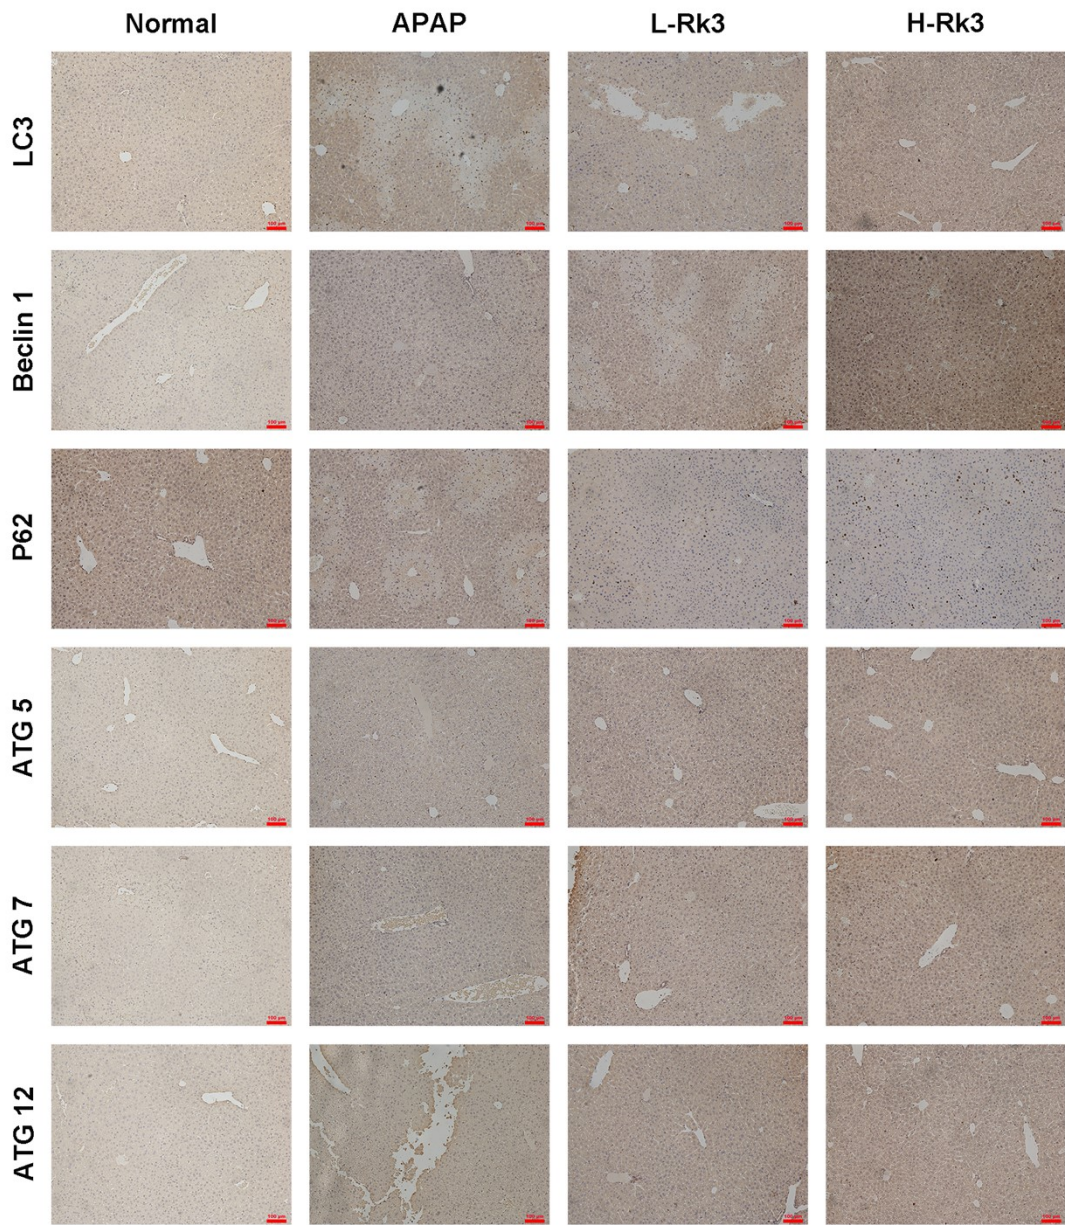

**Figure S3 Immunohistochemical staining of LC3, Beclin 1, P62, ATG 5, ATG 7, and ATG 12 in liver.**

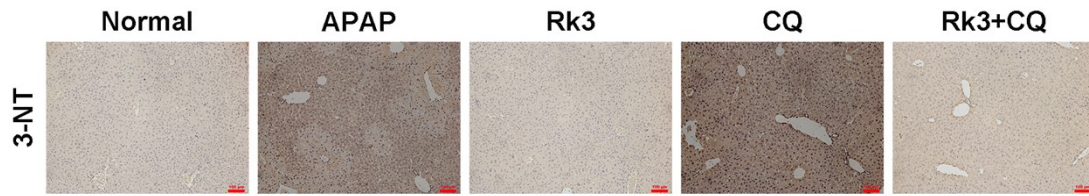

**Figure S4 Immunohistochemical staining of 3-NT using liver sections.**

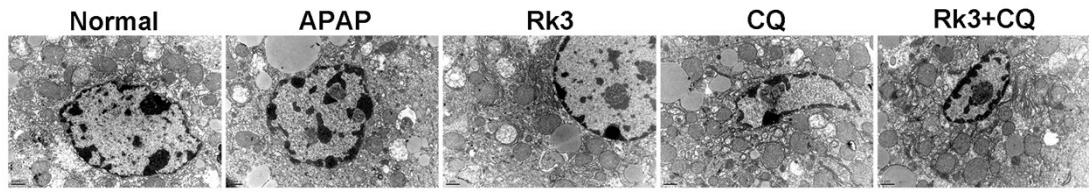

**Figure S5 TEM analyses of liver sections at 12000 × magnification.**



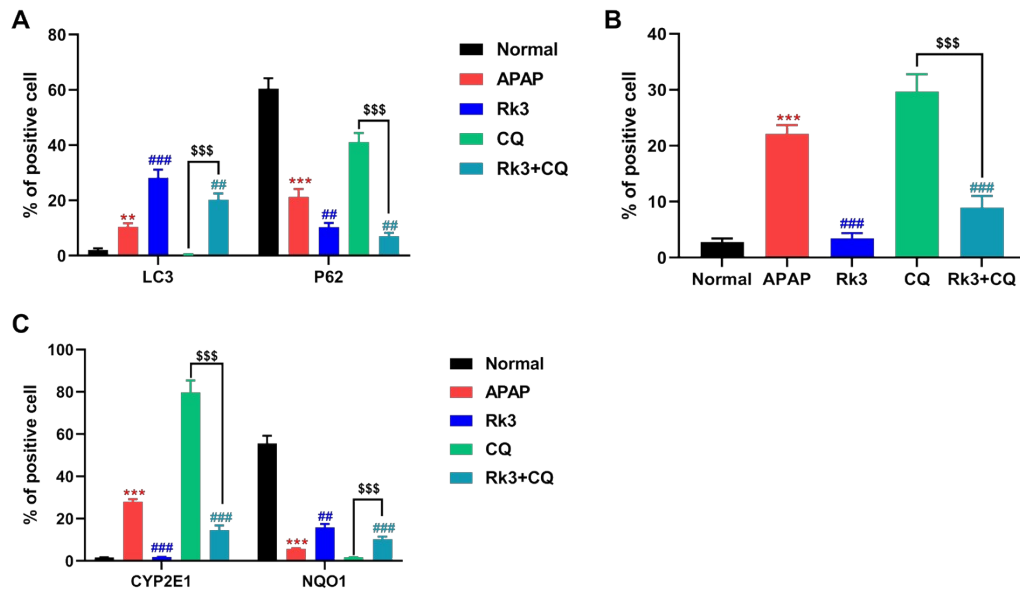

**Figure S6 Immunofluorescence quantitative analysis.**

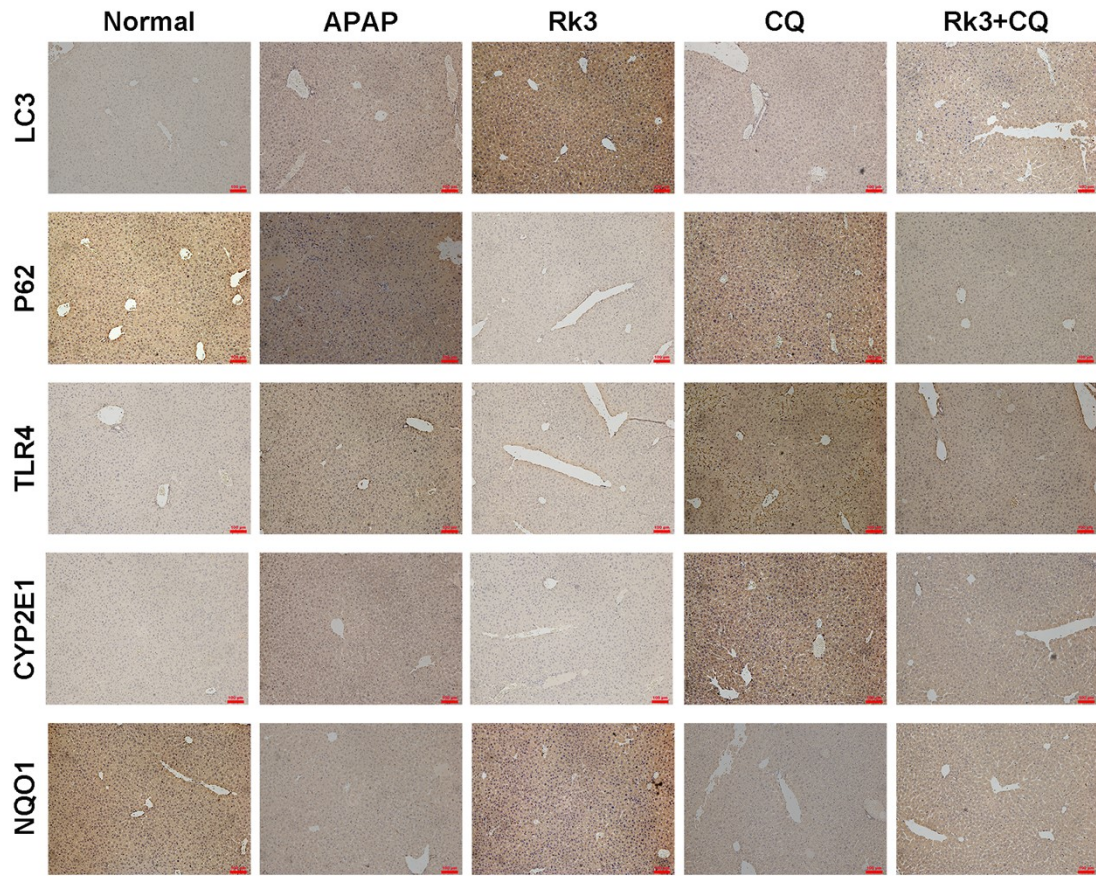

**Figure S7 Immunohistochemical staining of LC3, P62, TLR4, CYP2E1, and NQO1 in liver.**
